# Supplementary material for: Determinants of Full Breastfeeding at 6 Months and Any Breastfeeding at 12 and 24 Months among Women in Sydney: Findings from the HSHK Birth Cohort Study
Source: PubMed Central journal article supplement (PMC7432226; doi:10.3390/ijerph17155384), 2020-07-27
Supplement: ijerph-17-05384-s001.pdf [file ijerph-17-05384-s001.pdf]

**Table S1.** Unadjusted association of family and infant characteristics with the risk of stopping full breastfeeding at 6 months and any breastfeeding at 12 and 24 months.

| Variable                                                   | Full BF at 6 Months ( <i>n</i> = 934) |            |                 | Any BF at 12 Months ( <i>n</i> = 900) |            |                 | Any BF at 24 Months ( <i>n</i> = 795) |            |                 |
|------------------------------------------------------------|---------------------------------------|------------|-----------------|---------------------------------------|------------|-----------------|---------------------------------------|------------|-----------------|
|                                                            | Crude HR                              | 95% CI     | <i>p</i> -Value | Crude HR                              | 95% CI     | <i>p</i> -Value | Crude HR                              | 95% CI     | <i>p</i> -Value |
| <b>Family Characteristics</b>                              |                                       |            |                 |                                       |            |                 |                                       |            |                 |
| Maternal age (years)                                       | 0.99                                  | 0.98, 1.01 | 0.230           | 0.97                                  | 0.96, 0.98 | <0.001          | 0.97                                  | 0.96, 0.99 | <0.001          |
| Marital status of mother                                   |                                       |            | <0.001          |                                       |            | <0.001          |                                       |            | 0.002           |
| Married                                                    | 1.00                                  |            |                 | 1.00                                  |            |                 | 1.00                                  |            |                 |
| Living with a partner                                      | 0.98                                  | 0.80, 1.20 | 0.852           | 1.04                                  | 0.83, 1.30 | 0.754           | 1.00                                  | 0.82, 1.23 | 0.982           |
| Single                                                     | 1.65                                  | 1.32, 2.07 | <0.001          | 1.56                                  | 1.23, 1.99 | <0.001          | 1.53                                  | 1.23, 1.92 | <0.001          |
| Mother's country of birth                                  |                                       |            | 0.009           |                                       |            | 0.004           |                                       |            | 0.003           |
| Australia                                                  | 1.00                                  |            |                 | 1.00                                  |            |                 | 1.00                                  |            |                 |
| China                                                      | 0.99                                  | 0.75, 1.30 | 0.938           | 0.83                                  | 0.60, 1.14 | 0.245           | 0.93                                  | 0.71, 1.23 | 0.622           |
| Vietnam                                                    | 1.36                                  | 1.12, 1.65 | 0.002           | 1.23                                  | 0.99, 1.52 | 0.061           | 1.17                                  | 0.96, 1.42 | 0.127           |
| Other Asian country                                        | 0.91                                  | 0.74, 1.13 | 0.398           | 0.72                                  | 0.56, 0.92 | 0.009           | 0.71                                  | 0.57, 0.88 | 0.002           |
| Middle East/Africa                                         | 1.25                                  | 0.98, 1.59 | 0.069           | 1.19                                  | 0.92, 1.55 | 0.193           | 1.15                                  | 0.91, 1.47 | 0.237           |
| Other                                                      | 1.17                                  | 0.95, 1.44 | 0.131           | 0.92                                  | 0.73, 1.16 | 0.462           | 0.98                                  | 0.80, 1.20 | 0.837           |
| Maternal education                                         |                                       |            | <0.001          |                                       |            | <0.001          |                                       |            | <0.001          |
| Below Year 12                                              | 1.00                                  |            |                 | 1.00                                  |            |                 | 1.00                                  |            |                 |
| Year 12 completed                                          | 0.91                                  | 0.74, 1.12 | 0.363           | 0.79                                  | 0.63, 0.99 | 0.037           | 0.81                                  | 0.65, 0.99 | 0.044           |
| College/TAFE                                               | 0.63                                  | 0.51, 0.78 | <0.001          | 0.53                                  | 0.41, 0.67 | <0.001          | 0.59                                  | 0.48, 0.74 | <0.001          |
| University                                                 | 0.58                                  | 0.49, 0.70 | <0.001          | 0.45                                  | 0.37, 0.55 | <0.001          | 0.51                                  | 0.42, 0.61 | <0.001          |
| Mother's occupation                                        |                                       |            | 0.002           |                                       |            | <0.001          |                                       |            | 0.001           |
| Home duties                                                | 1.00                                  |            |                 | 1.00                                  |            |                 | 1.00                                  |            |                 |
| Managerial                                                 | 0.70                                  | 0.52, 0.94 | 0.018           | 0.69                                  | 0.50, 0.97 | 0.032           | 0.76                                  | 0.57, 1.02 | 0.707           |
| Professional                                               | 0.70                                  | 0.57, 0.85 | <0.001          | 0.60                                  | 0.48, 0.75 | <0.001          | 0.68                                  | 0.56, 0.83 | <0.001          |
| Sales/Clerical                                             | 0.86                                  | 0.71, 1.04 | 0.129           | 0.86                                  | 0.70, 1.07 | 0.170           | 0.88                                  | 0.73, 1.07 | 0.198           |
| Unskilled                                                  | 0.90                                  | 0.73, 1.12 | 0.353           | 0.90                                  | 0.71, 1.14 | 0.388           | 0.96                                  | 0.77, 1.19 | 0.698           |
| Partner's country of birth                                 |                                       |            | 0.010           |                                       |            | 0.039           |                                       |            | 0.045           |
| Australia                                                  | 1.00                                  |            |                 | 1.00                                  |            |                 | 1.00                                  |            |                 |
| China                                                      | 0.95                                  | 0.69, 1.30 | 0.747           | 0.86                                  | 0.60, 1.23 | 0.401           | 0.91                                  | 0.67, 1.25 | 0.581           |
| Vietnam                                                    | 1.37                                  | 1.11, 1.69 | 0.004           | 1.30                                  | 1.03, 1.64 | 0.031           | 1.14                                  | 0.92, 1.41 | 0.233           |
| Other Asian country                                        | 1.03                                  | 0.83, 1.29 | 0.766           | 0.93                                  | 0.73, 1.20 | 0.591           | 0.79                                  | 0.63, 0.99 | 0.040           |
| Middle East/Africa                                         | 1.38                                  | 1.10, 1.73 | 0.005           | 1.32                                  | 1.02, 1.69 | 0.029           | 1.20                                  | 0.96, 1.50 | 0.115           |
| Other                                                      | 1.16                                  | 0.95, 1.43 | 0.154           | 1.41                                  | 0.91, 1.44 | 0.264           | 1.07                                  | 0.87, 1.32 | 0.233           |
| Index for relative socioeconomic disadvantage <sup>a</sup> |                                       |            | <0.001          |                                       |            | <0.001          |                                       |            | <0.001          |
| Deciles 1 and 2                                            | 1.00                                  |            |                 | 1.00                                  |            |                 | 1.00                                  |            |                 |
| Deciles 3 and 4                                            | 0.93                                  | 0.78, 1.11 | 0.416           | 0.79                                  | 0.65, 0.96 | 0.017           | 0.83                                  | 0.70, 1.00 | 0.044           |
| Deciles 5 and 6                                            | 0.92                                  | 0.64, 1.35 | 0.681           | 0.59                                  | 0.37, 0.93 | 0.022           | 0.73                                  | 0.50, 1.06 | 0.103           |
| Deciles 7 and 8                                            | 0.75                                  | 0.62, 0.91 | 0.004           | 0.62                                  | 0.50, 0.78 | <0.001          | 0.70                                  | 0.58, 0.85 | <0.001          |
| Deciles 9 and 10                                           | 0.68                                  | 0.57, 0.81 | <0.001          | 0.65                                  | 0.53, 0.79 | <0.001          | 0.70                                  | 0.58, 0.83 | <0.001          |
| Intent to work or study 6 months postpartum                |                                       |            | 0.442           |                                       |            | 0.746           |                                       |            | 0.717           |
| No                                                         | 1.00                                  |            |                 | 1.00                                  |            |                 | 1.00                                  |            |                 |
| Yes                                                        | 1.06                                  | 0.91, 1.25 | 0.442           | 1.03                                  | 0.86, 1.23 | 0.746           | 0.97                                  | 0.83, 1.14 | 0.717           |
| Maternal employment status at 4 months                     |                                       |            | 0.021           |                                       |            | 0.266           |                                       |            | 0.045           |
| No                                                         | 1.00                                  |            |                 | 1.00                                  |            |                 | 1.00                                  |            |                 |
| Casual employment                                          | 0.86                                  | 0.58, 1.28 | 0.454           | 0.82                                  | 0.52, 1.32 | 0.416           | 0.75                                  | 0.49, 1.14 | 0.182           |
| Part-time employment                                       | 1.34                                  | 0.99, 1.82 | 0.058           | 1.08                                  | 0.77, 1.52 | 0.655           | 1.03                                  | 0.76, 1.40 | 0.831           |
| Full time employment                                       | 1.50                                  | 1.08, 2.08 | 0.017           | 1.38                                  | 0.96, 1.97 | 0.083           | 1.28                                  | 0.92, 1.79 | 0.141           |
| Maternal employment status at 12 months                    |                                       |            | 0.008           |                                       |            | 0.081           |                                       |            | 0.098           |

|                                                      |      |            |        |      |            |        |       |            |        |
|------------------------------------------------------|------|------------|--------|------|------------|--------|-------|------------|--------|
| No                                                   | 1.00 |            |        | 1.00 |            |        | 1.00  |            |        |
| Casual employment                                    | 1.06 | 0.75, 1.50 | 0.745  | 1.21 | 0.83, 1.77 | 0.327  | 0.89  | 0.62, 1.27 | 0.508  |
| Part-time employment                                 | 0.92 | 0.79, 1.08 | 0.312  | 1.10 | 0.92, 1.32 | 0.315  | 1.10  | 0.93, 1.29 | 0.268  |
| Full time employment                                 | 1.36 | 1.11, 1.66 | 0.004  | 1.33 | 1.06, 1.66 | 0.013  | 1.270 | 1.03, 1.56 | 0.023  |
| Parity                                               |      |            | 0.003  |      |            | 0.241  |       |            | 0.208  |
| Primiparous                                          | 1.00 |            |        | 1.00 |            |        | 1.00  |            |        |
| Multiparous                                          | 1.21 | 1.07, 1.38 | 0.003  | 1.09 | 0.94, 1.26 | 0.241  | 1.09  | 0.95, 1.24 | 0.208  |
| Mother's smoking status during pregnancy             |      |            | <0.001 |      |            | <0.001 |       |            | <0.001 |
| No                                                   | 1.00 |            |        | 1.00 |            |        | 1.00  |            |        |
| Yes                                                  | 1.69 | 1.28, 2.23 | <0.001 | 2.02 | 1.50, 2.71 | <0.001 | 1.88  | 1.42, 2.48 | <0.001 |
| Mother's alcohol consumption status during pregnancy |      |            | 0.193  |      |            | 0.398  |       |            | 0.467  |
| No                                                   | 1.00 |            |        | 1.00 |            |        | 1.00  |            |        |
| Yes                                                  | 0.87 | 0.71, 1.07 | 0.194  | 0.90 | 0.71, 1.15 | 0.398  | 0.92  | 0.77, 1.14 | 0.467  |
| Infant feeding decision made before pregnancy        |      |            | 0.530  |      |            | 0.970  |       |            | 0.856  |
| No                                                   | 1.00 |            |        | 1.00 |            |        | 1.00  |            |        |
| Yes                                                  | 1.06 | 0.89, 1.27 | 0.530  | 1.00 | 0.82, 1.23 | 0.970  | 0.98  | 0.82, 1.18 | 0.856  |
| Partner prefers breastfeeding                        |      |            | 0.017  |      |            | 0.005  |       |            | 0.045  |
| No                                                   | 1.00 |            |        | 1.00 |            |        | 1.00  |            |        |
| Yes                                                  | 0.83 | 0.72, 0.97 | 0.017  | 0.79 | 0.67, 0.93 | 0.005  | 0.86  | 0.73, 1.00 | 0.045  |
| <b>Infant Characteristics</b>                        |      |            |        |      |            |        |       |            |        |
| Infant gender                                        |      |            | 0.527  |      |            | 0.848  |       |            | 0.467  |
| Male                                                 | 1.00 |            |        | 1.00 |            |        | 1.00  |            |        |
| Female                                               | 0.96 | 0.84, 1.09 | 0.527  | 0.99 | 0.85, 1.14 | 0.848  | 0.953 | 0.84, 1.09 | 0.467  |
| Infant birthweight                                   |      |            | 0.379  |      |            | 0.868  |       |            | 0.973  |
| >2500g                                               | 1.00 |            |        | 1.00 |            |        | 1.00  |            |        |
| <2500g                                               | 1.14 | 0.85, 1.54 | 0.379  | 1.03 | 0.73, 1.45 | 0.868  | 1.00  | 0.74, 1.36 | 0.973  |
| Method of child delivery                             |      |            | 0.003  |      |            | 0.008  |       |            | 0.070  |
| Vaginal                                              | 1.00 |            |        | 1.00 |            |        | 1.00  |            |        |
| Caesarean section                                    | 1.24 | 1.08, 1.43 | 0.003  | 1.24 | 1.06, 1.45 | 0.008  | 1.14  | 0.99, 1.31 | 0.070  |
| Gestational Age                                      |      |            | 0.163  |      |            | 0.408  |       |            | 0.353  |
| Premature (<37 weeks)                                | 1.00 |            |        | 1.00 |            |        | 1.00  |            |        |
| Normal (>37 weeks)                                   | 0.84 | 0.66, 1.07 | 0.163  | 0.89 | 0.68, 1.17 | 0.408  | 0.89  | 0.69, 1.14 | 0.353  |

BF: Breastfeeding. HR: Hazard Ratio. 95% CI: 95% Confidence Interval. <sup>a</sup> 1 = most disadvantaged and 10 = least disadvantaged.
